# Supplementary material for: 3β-Hydroxy-Δ5-steroidal congeners from a column fraction of Dendronephthya puetteri attenuate LPS-induced inflammatory responses in RAW 264.7 macrophages and zebrafish embryo model
Source: RSC Adv. 2018 May 22;8(33):18626–34. doi: 10.1039/c8ra01967c (PMC9080511; doi:10.1039/c8ra01967c)
Supplement: RA-008-C8RA01967C-s001 [file RA-008-C8RA01967C-s001.xlsx]

## Sheet: Sheet 1
	Expanded GC chromatogram of DPCMH24													Full GC chromatogram of DPCMH24
Peak	Similarity (%)	Compound
1	88	Cholesta-5,22-dien-3-ol
2	90	Cholest-5-en-3-ol
3	85	Ergosta-5,22-dien-3-ol
4	81	22,23-Methylenecholestene-3-ol
5	87	Stigmast-5-en-3-ol
6	86	Stigmasta-5,24(28)-dien-3-ol

## Sheet: Sheet 2
	Trial 1	with triplicate determinations									Trial 2	with triplicate determinations
			Control		LPS		Dexamethasone						Control		LPS		Dexamethasone
	Trial 1										Trial 2
	IC50 Dexamethasone										IC50 Dexamethasone
	E1	3.46553									E1	3.39325
	E2	3.19732									E2	3.60465
	E3	3.46553									E3	3.19739
	AVG	3.37612									AVG	3.39843
	STD	0.154847									STD	0.203683
	IC50 = 3.38 ± 0.15										IC50 = 4.40 ± 0.20
						Average	Standard deviation
						3.38728	0.0157714
					Mean IC50 value			3.39 ± 0.02
